# Supplementary material for: Effect of Growth Factors and Hormones during In Vitro Growth Culture of Cumulus-Oocyte-Complexes Derived from Small Antral Follicles in Pigs
Source: MDPI journal article supplement (doi:10.3390/ani13071206), 2023-03-30
Supplement: s1 [file s1]

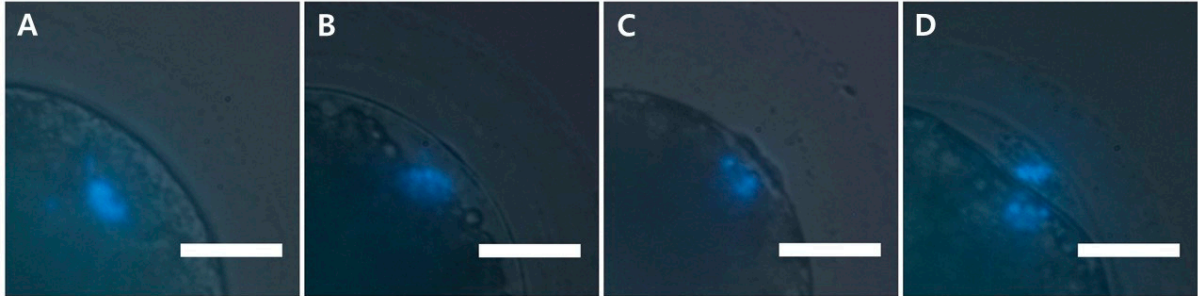

Figure S1. Nuclear status of porcine oocytes. Stained with Hoechst 33342: (A) GV/GVBD; (B) MI; (C) AI/TI; and (D) MII. Scale bar = 20  $\mu$ m.

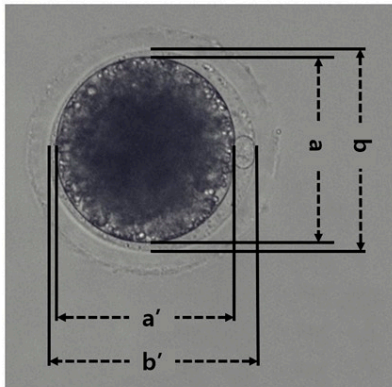

**Dimeter of oocyte (A) =  $(a+a')/2$**

**Inner dimeter of zona pellucida (B) =  $(b+b')/2$**

**Size of perivitelline space =  $(B-A)/2$**

Figure S2. Diagram of the measurement of oocyte diameter, and the size of the perivitelline space in porcine oocytes.
